# Supplementary material
Source: PubMed Central journal article supplement (PMC6055154)
Supplement: pnas.1800656115.sapp.pdf [file pnas.1800656115.sapp.pdf]

## Supplementary Information for

Repression of human and mouse brain inflammaging transcriptome by broad gene-body histone hyperacetylation

Hao Cheng<sup>a,b,1</sup>, Hongwen Xuan<sup>a,b,1</sup>, Christopher D. Green<sup>a</sup>, Yixing Han<sup>a</sup>, Na Sun<sup>a</sup>, Hongjie Shen<sup>c,d,e</sup>, Joseph McDermott<sup>a</sup>, David A. Bennett<sup>f</sup>, Fei Lan<sup>c,d,e</sup> and Jing-Dong J. Han<sup>a,2</sup>

Jing-Dong J. Han  
Email: [jdhan@picb.ac.cn](mailto:jdhan@picb.ac.cn)

### **This PDF file includes:**

Supplementary text  
Figs. S1 to S5  
Tables S1 to S4  
References for SI reference citations

## Supplementary Information Text

### Supplemental Experimental Procedures.

#### Human samples

Human brain prefrontal cortex materials were obtained from Chinese Brain Bank Center (CBBC) in Wu Han, China, Religious Order Study (ROS) and Rush Memory and Aging Project (MAP) at the RUSH Alzheimer's Disease Center, and National Institute of Child Health and Human Development (NICHD) Brain and Tissue Bank for Development Disorders at the University of Maryland. Baltimore, MD, USA. Informed consent was obtained for the use of the human tissues. For each pooled group, equal weight of PFC samples from different individuals within the same age range were mixed together for next step use. Details of samples are in Supplementary Table 1.

#### *In vivo* animal studies

C57BL/6 mice were cultured in Shanghai Model Organisms Center, Inc. with standard condition proved by The Association for Assessment and Accreditation of Laboratory Animal Care International (AAALAC), drug treatment, Morris water maze and brain tissue collection were also done by here. For drug treatment, mice were treated three times a week with DMSO (Sigma, Cat. # D2650) or SAHA (Cayman, Cat. # 10009929), which was diluted to 5% in normal saline, for 3 months by using intragastric administration (Table S3). In both batch 1 and 2 of these experiments studying aging effects and their attenuation by SAHA, female mice were used, while in the experiment studying SAHA dosage, male mice were used, which showed a similar response as female mice in the other experiments.

#### Brain RNA extraction and library preparation

50 mg human tissues or 20 mg mouse tissues were lysed in TRIzol (ThermoFisher, Cat. # 15596026) using a TissueRuptor (QIAGEN, Cat. # 9001271). Total RNA was extracted according to TRIzol standard procedures. All samples with the RNA integrity number (RIN, measured by Agilent RNA 6000 Nano Kit, Cat. # 5067-1511) >5 in human or >8 in mouse were used to construct sequencing libraries using Illumina standard protocols. Human brain R group polyA plus 50 bp single-end reads were generated by Illumina Hi-Seq2000. Mouse brain ribo minus 125 bp (batch 1 and 3) and 150 bp (batch 2) pair-end reads were generated by Illumina Hi-Seq2500 and Hi-Seq X Ten.

#### Brain ChIP and library preparation

150 mg human tissues or 30 mg mouse tissues were homogenize and crosslinked, 10  $\mu$ ~1mg lysis buffer with cOmplete™, Mini, EDTA-free Protease Inhibitor Cocktail (Sigma, Cat. # 4693159001) were added. Samples were sonicated by Bioruptor® Plus sonication device (diagenode, Cat. # B01020001) for 40 min at high power (30 s on/30 s off). After overnight incubate with 2.5  $\mu$ l Rabbit polyclonal anti-H3K27ac (Abcam, Cat. # ab4729), 40  $\mu$ l Dynabeads™ Protein G (ThermoFisher, Cat. # 10004D) were added to each sample for 2 h. Harvested beads were incubated with proteinase K (ThermoFisher, Cat. # AM2546) and RNase A (ThermoFisher, Cat. # EN0531) overnight. DNA fragment

were extracted by MinElute PCR Purification Kit (QIAGEN, Cat. # 28006). ChIP libraries were constructed using Illumina standard protocols. Human brain 50 bp (R group) and 100 bp (N group) single-end reads were generated by Illumina Hi-Seq2000. Mouse brain 125 bp (batch 1) and 150 bp (batch 2) pair-end reads were generated by Illumina Hi-Seq2500 and Hi-Seq X Ten, 50 bp (batch 3) single-end reads were generated by Illumina Hi-Seq2000.

### **Data process**

DAVID (v6.8) (1, 2) was used to do functional annotations, Benjamini adjust p-value are shown. Peaks from ChIP-seq data were called through MACS2 (v2.1.0) callpeak (3). Super enhancers were identified by ROSE (4, 5).

### **Functional gene association networks**

The functional gene association networks were generated by STRING (v10.5) (6) with default parameters (minimum combined confidence larger than 0.4). Inflammatory response (GO:0006954, download date 2018-03-23) gene lists for human was downloaded from the Gene Ontology (7, 8). Cytoscape (v3.6.0) was used to visualize networks.

### **DEGs prediction with generalized linear model (GLM)**

The GLMs were derived using R with parameter family=binomial(link='logit'). For each dataset, 90% genes are used as training data and the remaining 10% genes are used as testing data. Input features include: acetylation density on upstream of TSS (-2kbp to TSS), gene body, gene downstream (TTS to +2kbp), closest typical or super enhancer and log<sub>2</sub> fold change between old/young or SAHA/control. 10-fold cross-validation using 10 non-overlapping gene groups were performed for each dataset with cv.glm function and adjusted cross-validation estimate delta were shown. ROC is generated with the remaining 10% testing data by R to avoid overfitting the model.

### **Morris Water Maze**

The method of Morris water maze was adapted from previous published method (9). Experiment was done during last week with treatment. For 5 days hidden platform training, latency were measured as the time of each mice located to the platform, failed mice recorded as 60 seconds. For final probe trials, platform was removed, platform crosses were measured as the number of each mice cross the previously platformed area. Results are visualized by GraphPad Prism (v6.01).

Figure S1

A

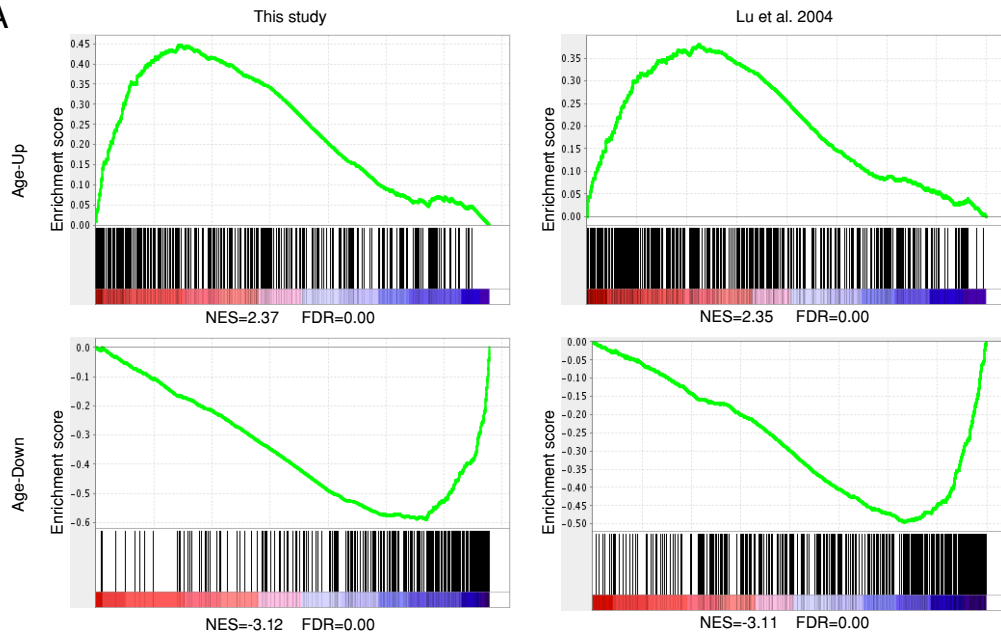

B

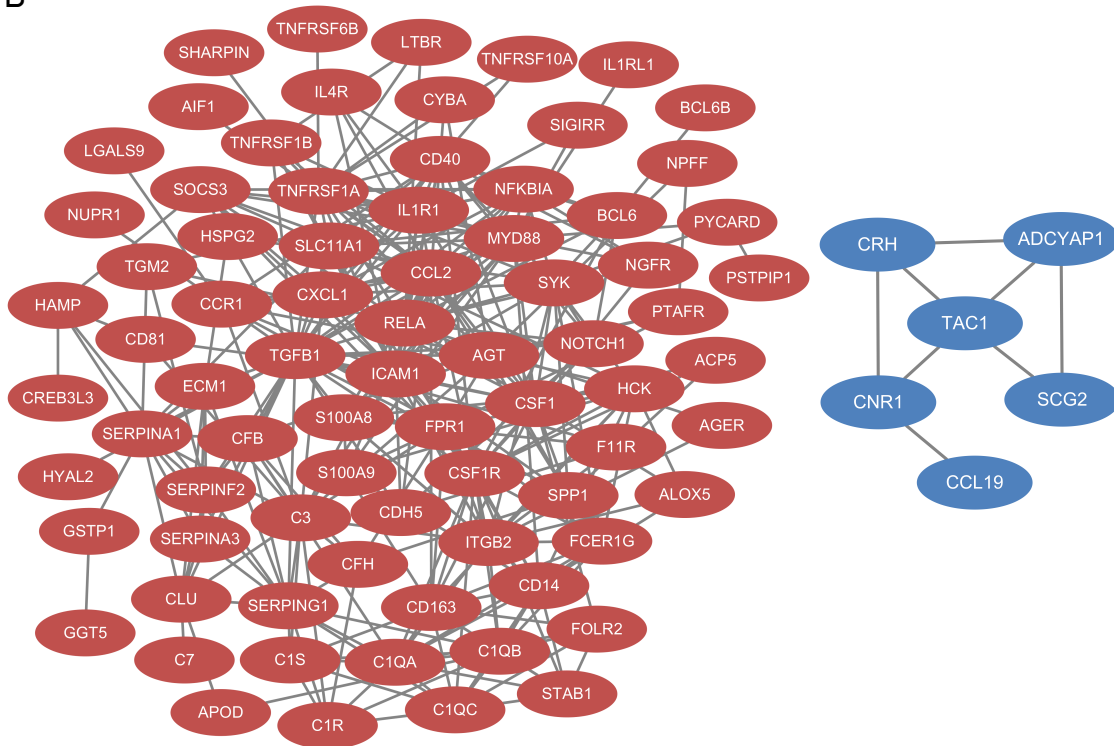

C

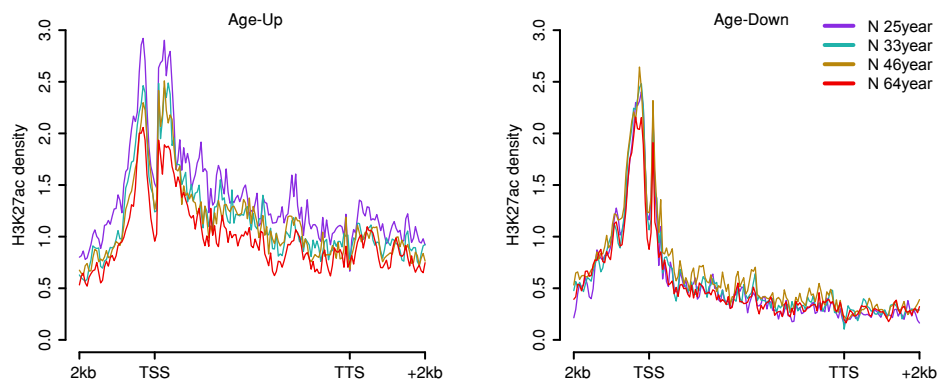

**Fig. S1. Human brain RNA-seq data in this study has significant agreement with published microarray data.**

(A) Comparison between DEGs of human brain RNA-seq data in this study and in Lu et al. 2004 microarray datasets by GSEA, rank lists are all genes sorted by Spearman rank correlation coefficients (RCC) to age in our RNA-seq data or in Lu et al. 2004 microarray datasets.

(B) Functional gene association networks of the inflammatory response genes among Age-Up (red nodes) or Age-Down (blue nodes) genes in human brain.

(C) N group H3K27ac profiles on Age-Up and Age-Down genes from intersections between Lu et al. 2004 microarray data and our RNA-seq data.

Figure S2

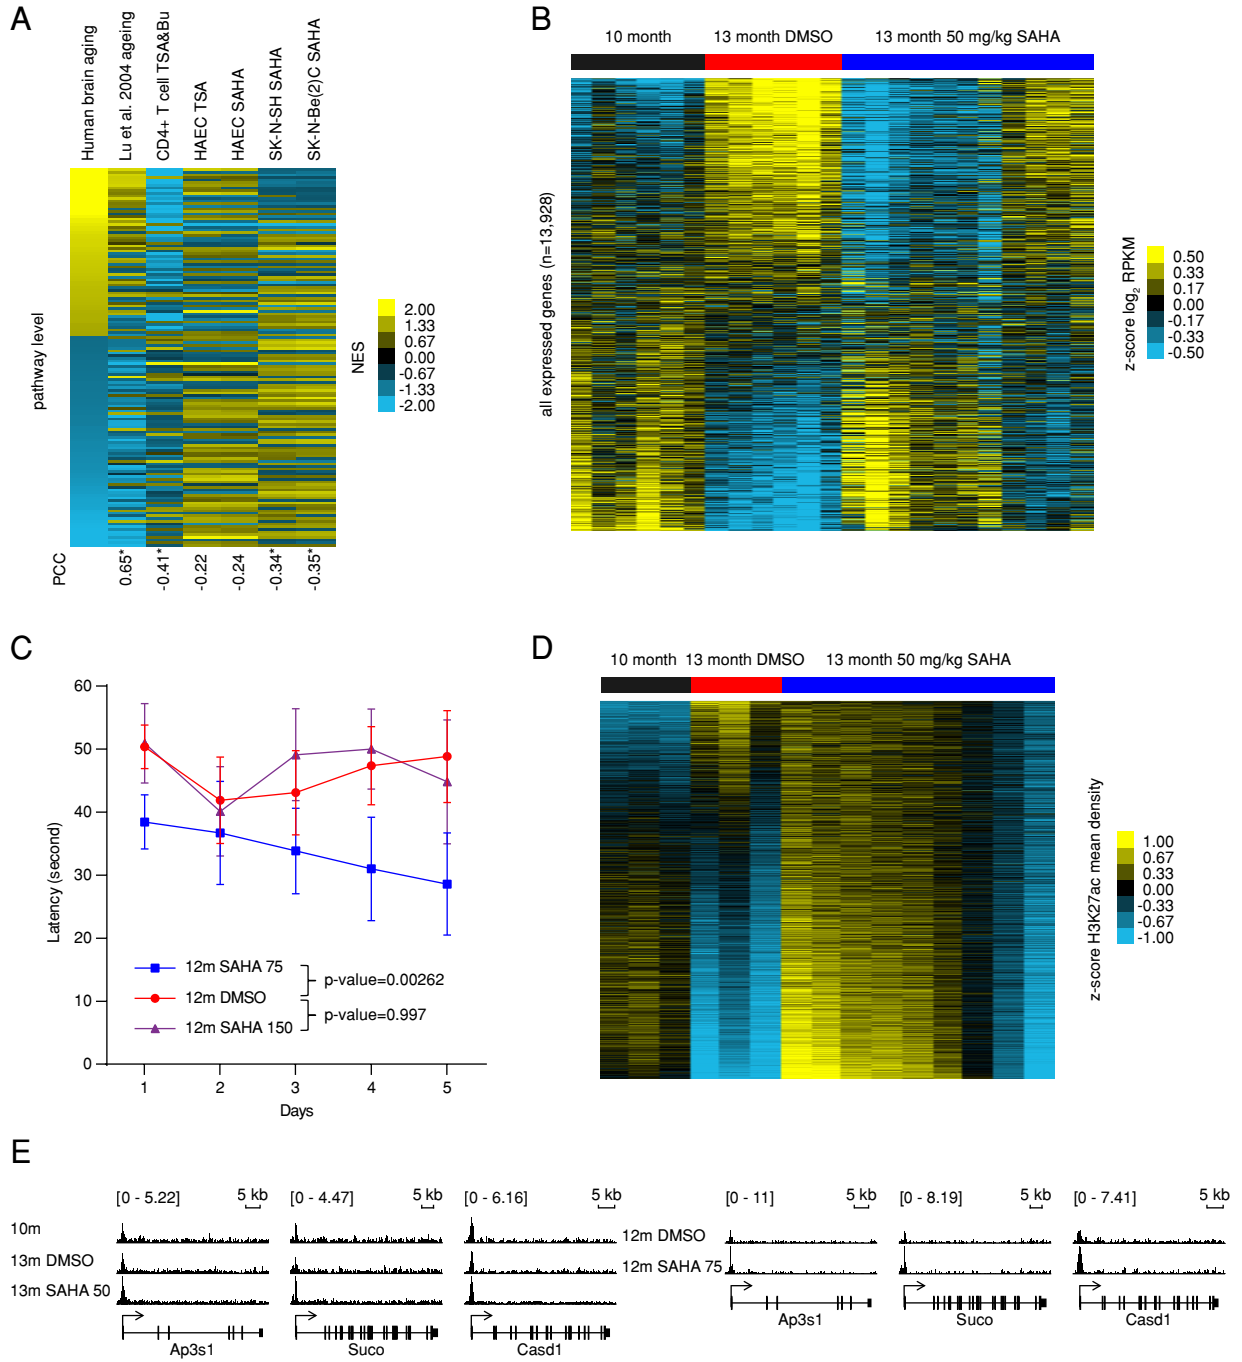

**Fig. S2. HDAC inhibitors reverse age-related phenotype.**

(A) KEGG pathways enriched in the top (positive NES) or bottom (negative NES) of the gene lists ranked by human brain age-dependent genes (sorted by their RCC to age) and HDACi induced DEGs (sorted by fold changes in HDACi vs. vehicle control samples) in different datasets. Yellow or blue color in the heatmap indicates a GSEA NES score for the terms enriched in the first column (nominal p-value < 0.05).

(B) Heatmap of  $\log_2$  RPKM from all expressed genes with z-score normalization for individual mice, genes are ordered by average fold change between DMSO-treated 13-month and 10-month old mice.

(C) Latency comparison in the water maze test for 2 months and 3 weeks 75 or 150 mg/kg SAHA and DMSO treated 12-month old mice, mean value and SEM are shown on curves, KS test p-values between the SAHA and DMSO treated groups are shown above the point.

(D) Heatmap of from TSS – 2 kb to TTS + 2 kb of mouse brain Age-Up and Age-Down genes with z-score normalization for individual mice, genes are ordered by average fold change between DMSO-treated 13-month and 10-month old mice.

(E) Merged IGV views of H3K27ac profiles on exemplary Age-Down genes.

Figure S3

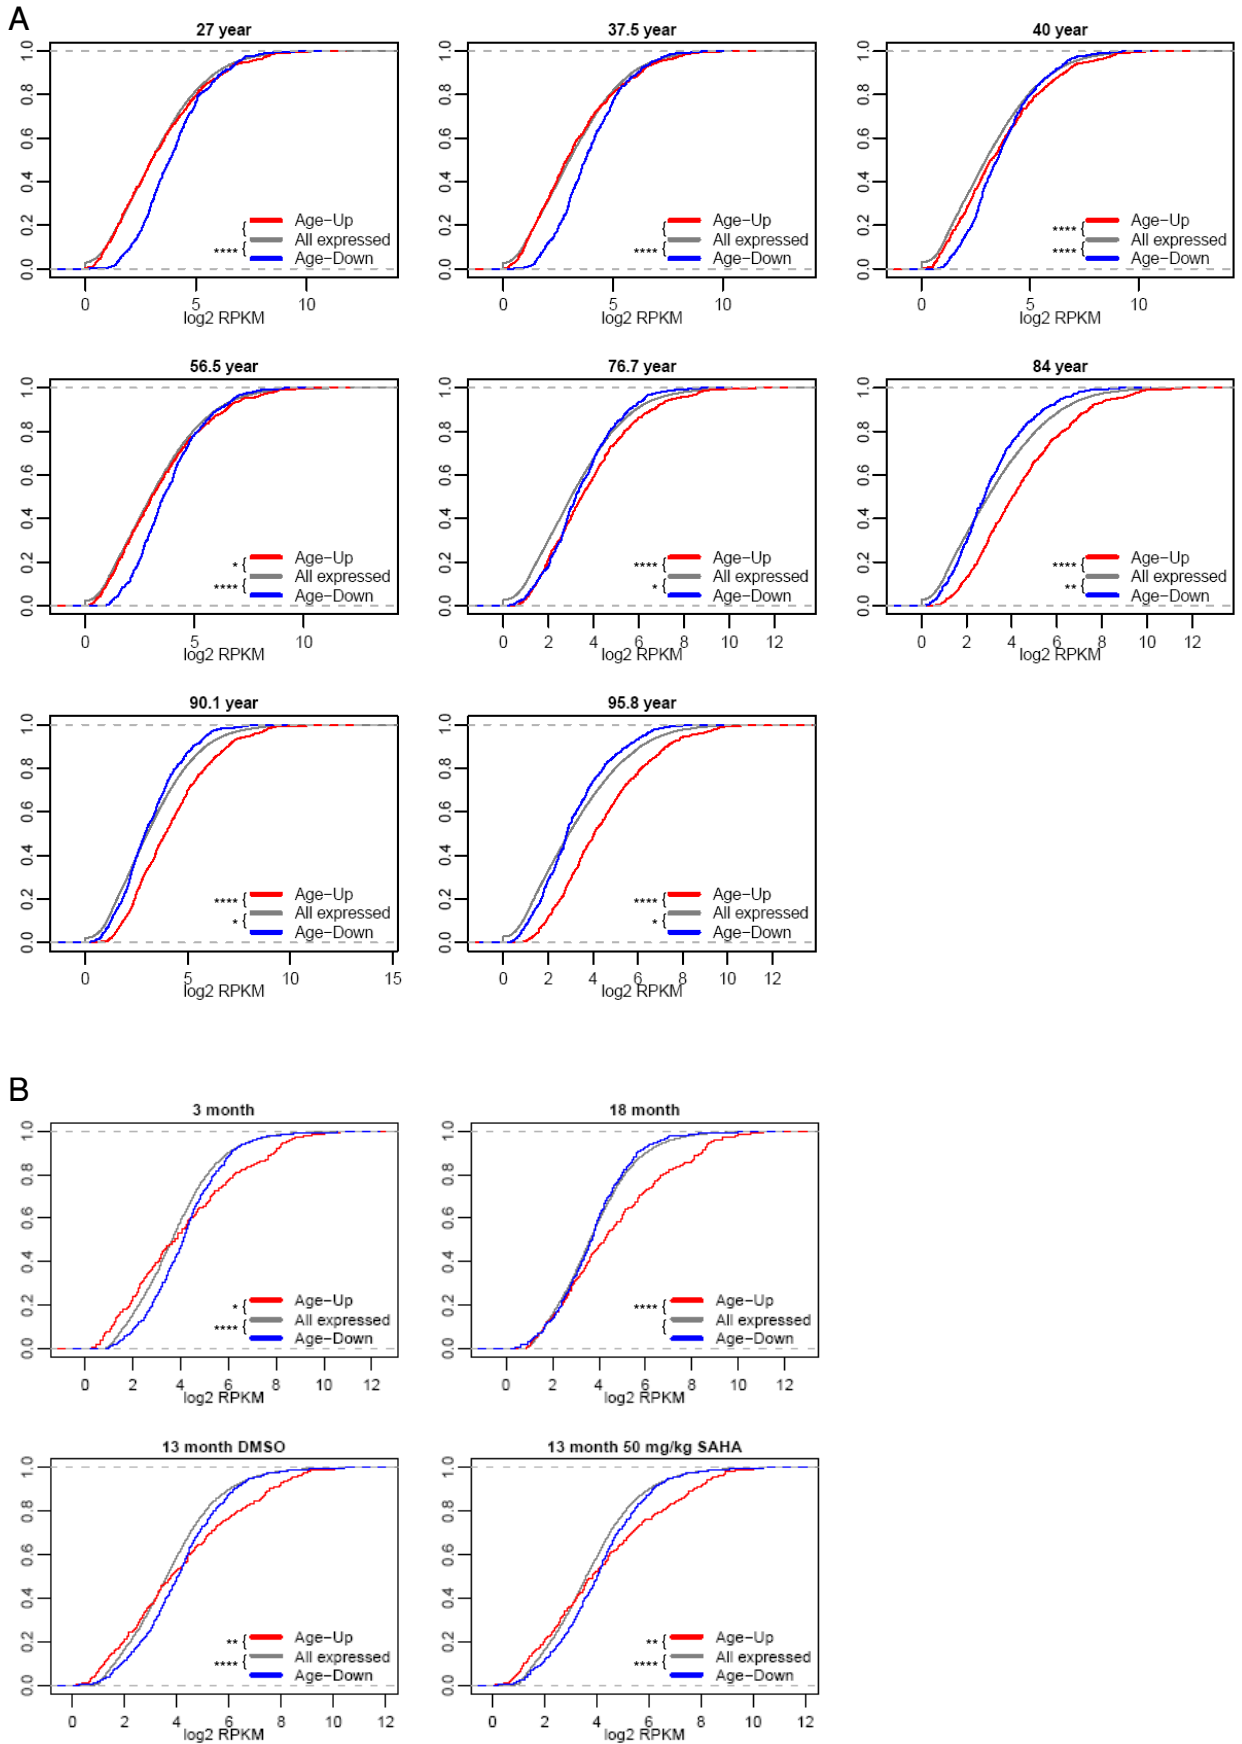



**Fig. S3. Age-Up genes are overexpressed in aged brains and attenuated by HDAC inhibition.**

(A) Empirical cumulative distribution for  $\log_2$  RPKM of Age-Up, Age-Down and all expressed genes in human brain, two-tail Student's t-test is used between each group. p-value  $< 0.05$ ,  $0.01$ ,  $0.001$  and  $0.0001$  are marked as "\*", "\*\*", "\*\*\*" and "\*\*\*\*".

(B) Empirical cumulative distribution for  $\log_2$  RPKM of Age-Up, Age-Down and all expressed genes in mouse brain, two-tail Student's t-test is used between each group. p-value  $< 0.05$ ,  $0.01$ ,  $0.001$  and  $0.0001$  are marked as "\*", "\*\*", "\*\*\*" and "\*\*\*\*".

Figure S4

A

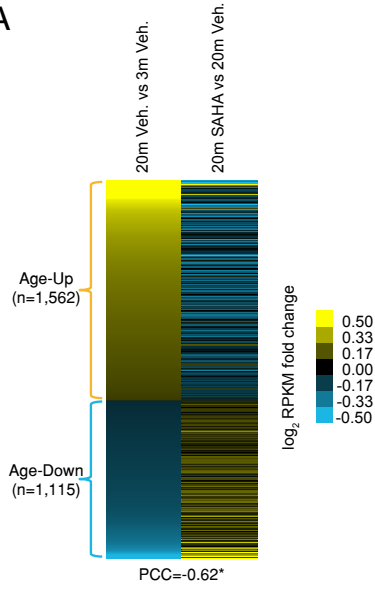

B

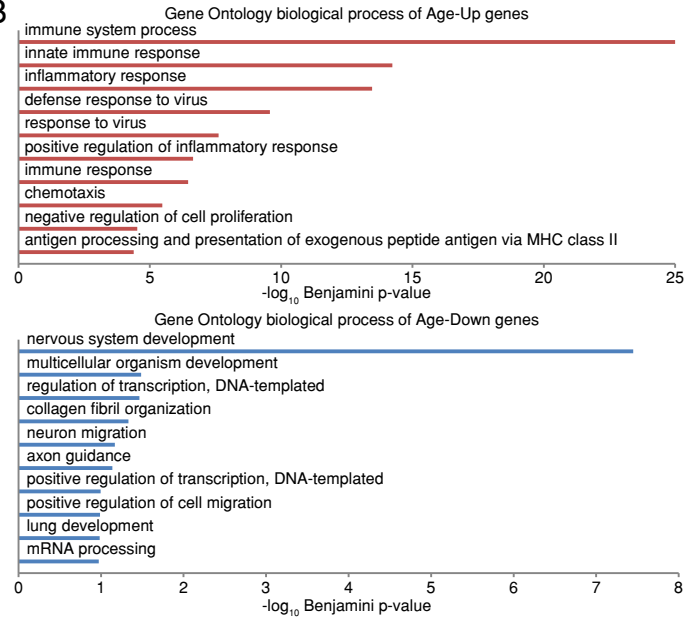

C

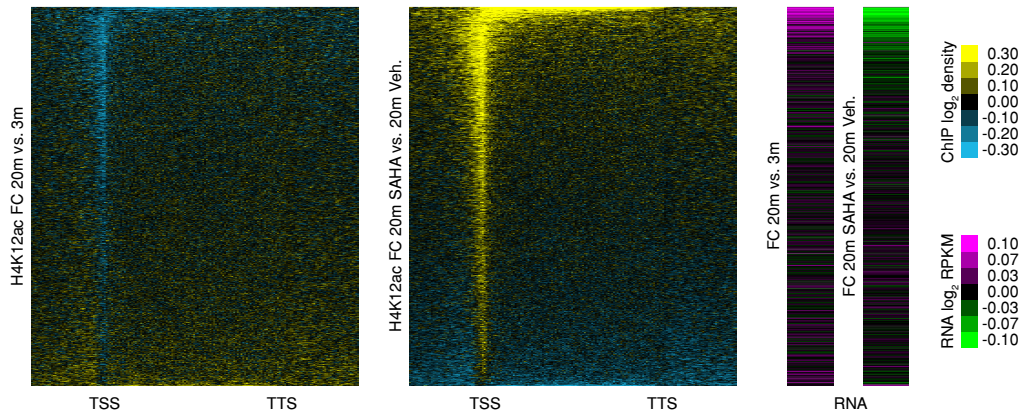

**Fig. S4. H4K12ac has a similar genome-wide pattern as H3K27ac during aging or under HDACi treatment.**

(A) SAHA attenuates age dependent transcriptome changes in mouse CA1 hippocampal subregion. The mouse CA1 hippocampal subregion age dependent genes are sorted by their  $\log_2$  fold change of expression between old (20-month) and young (3-month) mice (first column) with vehicle treatment (Veh.), then compared with those under 2 mg SAHA intake per day for 4 weeks (second column). Yellow/blue color in the first column indicates Age-Up/Down genes. The second column shows SAHA effects for the same genes. \* indicates p-value of PCC<0.0001.

(B) Top 10 enriched GO biological process terms among mouse CA1 hippocampal subregion Age-Up and Age-Down genes determined by DAVID.

(C) Heatmaps of  $\log_2$  fold changes of average H4K12 acetylation and expression in 20m Veh. vs. 3m Veh., 20m SAHA vs. Veh. treatment. Genes are ranked by average ChIP signal from upstream 2kb to downstream 2kb in 20m SAHA vs. Veh. treatment from high to low.

Figure S5

A

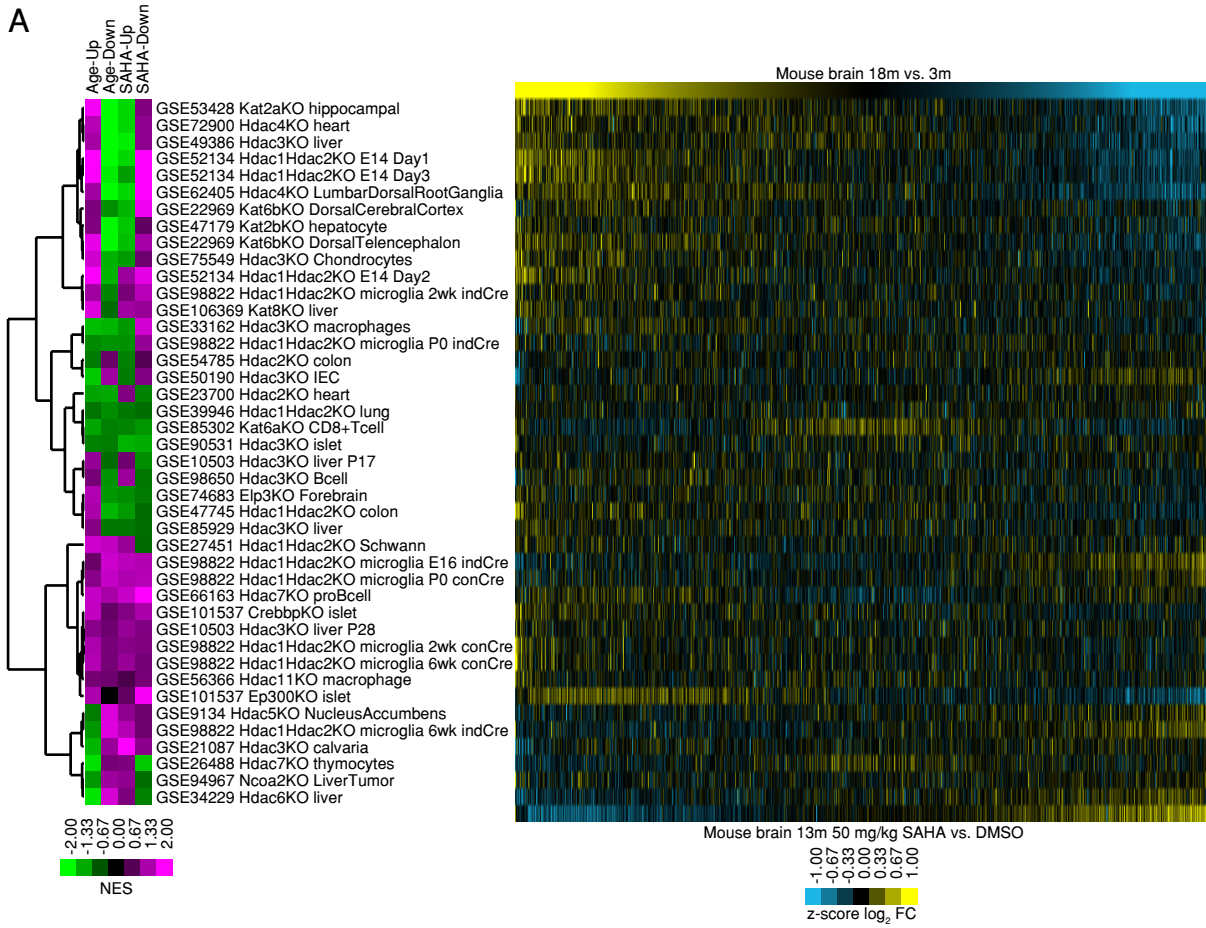

**Fig. S5. KO of HATs and HDACs having similar (purple in up DEGs and green in down DEGs) or opposite (green in up DEGs and purple in down DEGs) gene expression patterns as aging or SAHA treatment.**

(A) Heatmaps of GSEA NES (left) and z-score normalized  $\log_2$  fold change (right) of HAT/HDAC knockout versus control gene expression changes in different mouse tissues from GEO database (5-30), compared with the effect of aging and SAHA in mouse brain.

**Table S1. Human brain samples used in this study.**

Information of human brain samples used for RNA-seq and ChIP-seq.

| Group           | Sample ID | Source | Age     | Race             | RIN |
|-----------------|-----------|--------|---------|------------------|-----|
| R 27 year old   | 200950    | CBBC   | 24      | Chinese          | 6.6 |
|                 | 2010336   | CBBC   | 24      | Chinese          | 7.6 |
|                 | 2009330   | CBBC   | 25      | Chinese          | 7.9 |
|                 | 2010150   | CBBC   | 27      | Chinese          | 6.3 |
|                 | 2010366   | CBBC   | 27      | Chinese          | 7.6 |
|                 | 2009193   | CBBC   | 27      | Chinese          | 8.2 |
|                 | 2008274   | CBBC   | 29      | Chinese          | 7.7 |
|                 | 2010177   | CBBC   | 30      | Chinese          | 7.8 |
|                 | 2010102   | CBBC   | 32      | Chinese          | 7.3 |
| R 37.5 year old | 777       | CBBC   | 22      | African American | 7.3 |
|                 | 1026      | CBBC   | 28      | Caucasian        | 8.1 |
|                 | 1502      | CBBC   | 29      | Caucasian        | 7.4 |
|                 | 1326      | CBBC   | 37      | Caucasian        | 6.8 |
|                 | 816       | CBBC   | 38      | African American | 7.3 |
|                 | 4645      | CBBC   | 39      | African American | 7.9 |
|                 | 1375      | CBBC   | 40      | Caucasian        | 7.5 |
|                 | 871       | CBBC   | 42      | Caucasian        | 7.8 |
| R 40 year old   | 2010321   | CBBC   | 39      | Chinese          | 6.3 |
|                 | 2008295   | CBBC   | 40      | Chinese          | 5.3 |
|                 | 2010056   | CBBC   | 40      | Chinese          | 6.5 |
|                 | 2008298   | CBBC   | 40      | Chinese          | 6.8 |
|                 | 2009290   | CBBC   | 40      | Chinese          | 8.1 |
|                 | 2010001   | CBBC   | 41      | Chinese          | 7   |
|                 | 2010324   | CBBC   | 42      | Chinese          | 5.1 |
|                 | 2010A     | CBBC   | 42      | Chinese          | 7   |
| 2010024         | CBBC      | 42     | Chinese | 7.6              |     |
| R 56.5 year old | 2011008   | CBBC   | 54      | Chinese          | 6.9 |
|                 | 2010016   | CBBC   | 52      | Chinese          | 7.1 |
|                 | 2010166   | CBBC   | 60      | Chinese          | 7   |
|                 | 2009114   | CBBC   | 47      | Chinese          | 7.4 |
|                 | 2009147   | CBBC   | 47      | Chinese          | 7.1 |
|                 | 2009337   | CBBC   | 54      | Chinese          | 6.9 |
|                 | 2008281   | CBBC   | 59      | Chinese          | 6.5 |
|                 | 2010022   | CBBC   | 60      | Chinese          | 6.7 |
|                 | 2009149   | CBBC   | 52      | Chinese          | 6.8 |
| R 76.7 year old | 34726040  | ROSMAP | 72.83   | Caucasian        | 8.3 |
|                 | 92113025  | ROSMAP | 74.83   | Caucasian        | 7.4 |
|                 | 21274866  | ROSMAP | 75.85   | Caucasian        | 8   |
|                 | 36492755  | ROSMAP | 76.28   | Caucasian        | 7.8 |

|                 |          |        |        |           |     |
|-----------------|----------|--------|--------|-----------|-----|
|                 | 10478041 | ROSMAP | 76.7   | Caucasian | 7.3 |
|                 | 15844425 | ROSMAP | 76.82  | Caucasian | 7.8 |
|                 | 67185070 | ROSMAP | 77.8   | Caucasian | 8.3 |
|                 | 10514454 | ROSMAP | 79.53  | Caucasian | 7.6 |
|                 | 50105437 | ROSMAP | 80.06  | Caucasian | 7.8 |
| R 84 year old   | 11409232 | ROSMAP | 80.1   | Caucasian | 6.1 |
|                 | 21001933 | ROSMAP | 80.85  | Caucasian | 7   |
|                 | 10929637 | ROSMAP | 81.3   | Caucasian | 8.7 |
|                 | 50103967 | ROSMAP | 82.23  | Caucasian | 7.3 |
|                 | 20416210 | ROSMAP | 83.98  | Caucasian | 5   |
|                 | 61344957 | ROSMAP | 84.73  | Caucasian | 6   |
|                 | 24310553 | ROSMAP | 84.75  | Caucasian | 7.6 |
|                 | 20904509 | ROSMAP | 85.79  | Caucasian | 5.8 |
|                 | 95491648 | ROSMAP | 85.8   | Caucasian | 7.9 |
| R 87.3 year old | 53772202 | ROSMAP | 86.2   | Caucasian | 8.2 |
|                 | 20139850 | ROSMAP | 86.32  | Caucasian | 8.1 |
|                 | 50104422 | ROSMAP | 86.35  | Caucasian | 8.7 |
|                 | 20767628 | ROSMAP | 86.84  | Caucasian | 7.9 |
|                 | 20105242 | ROSMAP | 87.29  | Caucasian | 7   |
|                 | 44749170 | ROSMAP | 87.42  | Caucasian | 8   |
|                 | 89001223 | ROSMAP | 87.57  | Caucasian | 7.5 |
|                 | 10383017 | ROSMAP | 87.87  | Caucasian | 7.4 |
|                 | 11072071 | ROSMAP | 87.95  | Caucasian | 7.5 |
| R 90.1 year old | 22776575 | ROSMAP | 89.1   | Caucasian | 6.9 |
|                 | 91921829 | ROSMAP | 89.3   | Caucasian | 7.3 |
|                 | 50101659 | ROSMAP | 89.35  | Caucasian | 6.8 |
|                 | 50100482 | ROSMAP | 89.36  | Caucasian | 7.2 |
|                 | 11342432 | ROSMAP | 90.11  | Caucasian | 7.4 |
|                 | 70816595 | ROSMAP | 90.54  | Caucasian | 6.8 |
|                 | 50102376 | ROSMAP | 91.09  | Caucasian | 7   |
|                 | 87038802 | ROSMAP | 91.11  | Caucasian | 8.5 |
|                 | 67429065 | ROSMAP | 91.78  | Caucasian | 6.1 |
| R 95.8 year old | 41773404 | ROSMAP | 92.44  | Caucasian | 7   |
|                 | 82624422 | ROSMAP | 92.55  | Caucasian | 6.4 |
|                 | 89903942 | ROSMAP | 93.1   | Caucasian | 8.2 |
|                 | 50300084 | ROSMAP | 95     | Caucasian | 7.6 |
|                 | 23690880 | ROSMAP | 95.82  | Caucasian | 5.7 |
|                 | 21403733 | ROSMAP | 96.44  | Caucasian | 7.4 |
|                 | 50101523 | ROSMAP | 96.71  | Caucasian | 7.7 |
|                 | 43074402 | ROSMAP | 97.88  | Caucasian | 7.1 |
|                 | 20174533 | ROSMAP | 100.84 | Caucasian | 8.3 |
| N 25 year old   | 2C0637   | NICHD  | 24     | Caucasian | 5   |

|               |        |       |    |           |     |
|---------------|--------|-------|----|-----------|-----|
|               | 2C0607 | NICHD | 25 | Caucasian | 7   |
|               | 2C0600 | NICHD | 25 | Caucasian | 5.1 |
|               | 2C0625 | NICHD | 27 | Caucasian | 6.9 |
|               | 2C0599 | NICHD | 27 | Caucasian | 5.7 |
| N 33 year old | 2C0630 | NICHD | 28 | Caucasian | 5.7 |
|               | 2C0606 | NICHD | 32 | Caucasian | 5.5 |
|               | 2C0615 | NICHD | 33 | Caucasian | 6.2 |
|               | 2C0605 | NICHD | 34 | Caucasian | 6.4 |
|               | 2C0622 | NICHD | 43 | Caucasian | 6.5 |
| N 46 year old | 2C0626 | NICHD | 46 | Caucasian | 7.6 |
|               | 2C0618 | NICHD | 46 | Caucasian | 5.3 |
|               | 2C0633 | NICHD | 46 | Caucasian | 5.2 |
|               | 2C0627 | NICHD | 48 | Caucasian | 6.3 |
|               | 2C0631 | NICHD | 48 | Caucasian | 5.3 |
| N 64 year old | 2C0621 | NICHD | 54 | Caucasian | 7.3 |
|               | 2C0636 | NICHD | 59 | Caucasian | 5.9 |
|               | 2C0638 | NICHD | 64 | Caucasian | 5.3 |
|               | 2C0634 | NICHD | 67 | Caucasian | 6.3 |
|               | 2C0635 | NICHD | 67 | Caucasian | 5.7 |



**Table S2. Human brain Age-Up and Age-Down genes are enriched for different DNA binding proteins.**

Using ChIP-seq data of DNA binding proteins in human cells are collected from ENCODE Databases, target enrichment for DNA binding proteins in the promoter (TSS +/- 1kp) or gene body (i.e. genes having ChIP-seq binding peaks by each of the DNA binding proteins) is tested against the rank list of genes sorted by their human brain expression RCC to age from high to low using GSEA. Top 20 enriched terms are shown. Proteins with NES>0 and <0 are consider as enriched among Age-Up and Age-Down genes, respectively.

| Age-Up promoter |                 |       |             |  |
|-----------------|-----------------|-------|-------------|--|
| cell type       | antibody        | NES   | FDR q-value |  |
| A549            | Pol2(phosphoS2) | 2.069 | 0.001       |  |
| ECC1            | GR              | 1.839 | 0.003       |  |
| K562            | EFOS            | 1.741 | 0.009       |  |
| K562            | BCL3            | 1.726 | 0.008       |  |
| GM12878         | p300            | 1.689 | 0.011       |  |
| HeLa S3         | BRG1            | 1.579 | 0.023       |  |
| GM12878         | EBF1            | 1.547 | 0.024       |  |
| K562            | FOSL1           | 1.529 | 0.024       |  |
| GM12878         | BCL3            | 1.500 | 0.026       |  |
| GM18526         | NFKB            | 1.474 | 0.028       |  |
| H1-hESC         | RXRA            | 1.467 | 0.028       |  |
| Hep G2          | HNF4A           | 1.461 | 0.027       |  |
| A549            | BCL3            | 1.456 | 0.027       |  |
| ECC1            | ERaa            | 1.440 | 0.028       |  |
| Hep G2          | HNF4            | 1.425 | 0.030       |  |
| K562            | HDAC6           | 1.424 | 0.029       |  |
| Hep G2          | RXRA            | 1.422 | 0.027       |  |
| GM19193         | NFKB            | 1.400 | 0.030       |  |
| A549            | FOSL2           | 1.397 | 0.030       |  |
| K562            | Pol2(phosphoS2) | 1.386 | 0.032       |  |

| Age-Up gene body |                 |       |             |  |
|------------------|-----------------|-------|-------------|--|
| cell type        | antibody        | NES   | FDR q-value |  |
| A549             | Pol2(phosphoS2) | 1.852 | 0.003       |  |
| GM12878          | Pol3            | 1.683 | 0.011       |  |
| K562             | Pol2(phosphoS2) | 1.637 | 0.010       |  |
| K562             | BCL3            | 1.630 | 0.007       |  |
| K562             | HDAC6           | 1.621 | 0.006       |  |
| Hep G2           | ZBTB7A          | 1.478 | 0.018       |  |
| K562             | CTCF            | 1.475 | 0.016       |  |
| Hep G2           | IRF3            | 1.462 | 0.015       |  |
| HeLa S3          | BRG1            | 1.448 | 0.015       |  |
| K562             | ZNF263          | 1.445 | 0.014       |  |
| GM18526          | NFKB            | 1.410 | 0.017       |  |

|         |        |       |       |
|---------|--------|-------|-------|
| Hep G2  | HNF4A  | 1.405 | 0.016 |
| Hep G2  | ERRa   | 1.397 | 0.016 |
| K562    | HDAC2  | 1.364 | 0.019 |
| H1-hESC | RXRA   | 1.362 | 0.018 |
| K562    | ZBTB33 | 1.341 | 0.021 |
| ECC-1   | GR     | 1.337 | 0.020 |
| GM12878 | USF1   | 1.326 | 0.021 |
| GM12878 | NFYA   | 1.324 | 0.021 |
| GM19193 | NFKB   | 1.322 | 0.020 |

#### Age-Down promoter

| cell type | antibody | NES    | FDR q-value |
|-----------|----------|--------|-------------|
| SH-SY5Y   | GATA3    | -2.141 | 0.002       |
| HMEC      | EZH2     | -1.761 | 0.023       |
| PFSK-1    | TAF1     | -1.728 | 0.022       |
| NHEK      | EZH2     | -1.692 | 0.022       |
| HeLa S3   | SPT20    | -1.681 | 0.018       |
| H1-hESC   | CHD1     | -1.622 | 0.025       |
| HeLa S3   | E2F1     | -1.582 | 0.033       |
| PFSK-1    | SIN3A    | -1.541 | 0.040       |
| HeLa S3   | TF3      | -1.518 | 0.045       |
| PFSK-1    | NRSF     | -1.513 | 0.042       |
| HEK293    | KAP1     | -1.508 | 0.040       |
| SH-SY5Y   | GATA2    | -1.501 | 0.038       |
| SK-N-SH   | NRSF     | -1.472 | 0.044       |
| K562      | UBF      | -1.471 | 0.041       |
| HSMMT     | EZH2     | -1.467 | 0.040       |
| Hep G2    | NRSF     | -1.444 | 0.045       |
| HeLa S3   | E2F1     | -1.439 | 0.044       |
| H1-hESC   | YY1      | -1.434 | 0.043       |
| GM12878   | YY1      | -1.422 | 0.045       |
| GM12878   | NRF1     | -1.422 | 0.043       |

#### Age-Down gene body

| cell type | antibody | NES    | FDR q-value |
|-----------|----------|--------|-------------|
| SH-SY5Y   | GATA3    | -2.350 | 0.000       |
| HeLa S3   | SPT20    | -2.229 | 0.000       |
| GM12878   | ZNF274   | -2.104 | 0.000       |
| Hep G2    | ZNF274   | -2.076 | 0.000       |
| IMR90     | MAFK     | -2.055 | 0.000       |
| GM08714   | ZNF274   | -1.994 | 0.001       |
| U2OS      | SETDB1   | -1.992 | 0.001       |
| Hep G2    | MAFF     | -1.991 | 0.001       |
| NT2D1     | ZNF274   | -1.979 | 0.001       |
| K562      | BRF2     | -1.962 | 0.001       |
| Hep G2    | MAFK     | -1.954 | 0.001       |

---

|         |        |        |       |
|---------|--------|--------|-------|
| K562    | MAFF   | -1.920 | 0.001 |
| HEK293  | TCF7L2 | -1.895 | 0.001 |
| GM12878 | JUND   | -1.855 | 0.002 |
| K562    | MAFK   | -1.805 | 0.002 |
| H1-hESC | MAFK   | -1.787 | 0.002 |
| A549    | FOXA1  | -1.776 | 0.003 |
| H1-hESC | CEBPB  | -1.775 | 0.003 |
| K562    | KAP1   | -1.774 | 0.002 |
| HeLa S3 | ZNF274 | -1.758 | 0.002 |

---

Table S3. Mice used in this study.

| Batch | Age (month) | Gender | Treatment      | Mouse number | Mouse for RNA-seq | Mouse for ChIP-seq |
|-------|-------------|--------|----------------|--------------|-------------------|--------------------|
| 1     | 3           | Female | Blank          | 3            | 3                 | 3                  |
|       | 18          | Female | Blank          | 3            | 3                 | 3                  |
| 2     | 10          | Female | Blank          | 12           | 6                 | 3                  |
|       | 13          | Female | DMSO           | 12           | 6                 | 3                  |
|       | 13          | Female | 50 mg/kg SAHA  | 12           | 11                | 9                  |
| 3     | 12          | Male   | DMSO           | 6            | 2                 | 2                  |
|       | 12          | Male   | 75 mg/kg SAHA  | 5            | 1                 | 2                  |
|       | 12          | Male   | 150 mg/kg SAHA | 4            | 2                 | 0                  |

**Table S4. KEGG pathways and NES values in the heatmap.**

KEGG pathways have the same order as heatmap in Fig. 2A. Pathways enriched for Age-Up genes are mainly related to inflammation, while pathways enriched for Age-Down genes include neural specific functions and energy production metabolic functions in human brain. HDACi can globally reverse those age-related pathways.

| KEGG pathways                                | Huma<br>n<br>brain<br>agein<br>g | Lu et<br>al.<br>2004<br>agein<br>g | CD4+<br>T cell<br>TSA<br>&Bu | HAE<br>C<br>TSA | HAE<br>C<br>SAH<br>A | SK-<br>N-SH<br>SAH<br>A | SK-<br>N-<br>Be(2)<br>C<br>SAH<br>A |
|----------------------------------------------|----------------------------------|------------------------------------|------------------------------|-----------------|----------------------|-------------------------|-------------------------------------|
| STAPHYLOCOCCUS AUREUS INFECTION              | 3.02                             | 1.70                               | -2.04                        | 1.62            | 1.51                 | -1.06                   | -1.07                               |
| INTESTINAL IMMUNE NETWORK FOR IGA PRODUCTION | 2.62                             | 1.33                               | -2.48                        | -1.11           | -1.18                | -1.10                   | -1.27                               |
| ALLOGRAFT REJECTION                          | 2.59                             | 1.66                               | -2.25                        | 1.15            | 1.10                 | -1.47                   | -1.37                               |
| SYSTEMIC LUPUS ERYTHEMATOSUS                 | 2.52                             | 1.60                               | 1.31                         | 0.81            | 0.71                 | -0.87                   | -0.86                               |
| GRAFT-VERSUS-HOST DISEASE                    | 2.45                             | 1.62                               | -2.16                        | -0.90           | 0.82                 | -1.28                   | -1.30                               |
| AUTOIMMUNE THYROID DISEASE                   | 2.44                             | 1.63                               | -2.28                        | 1.16            | 1.12                 | -1.32                   | -1.15                               |
| ASTHMA                                       | 2.39                             | 1.67                               | -1.83                        | 1.24            | 1.19                 | -1.23                   | -1.19                               |
| COMPLEMENT AND COAGULATION CASCADES          | 2.31                             | 1.37                               | -1.46                        | 0.96            | -0.99                | -0.93                   | -0.89                               |
| LEISHMANIASIS                                | 2.26                             | 1.06                               | -2.16                        | 0.89            | 0.92                 | -0.90                   | -0.91                               |
| ANTIGEN PROCESSING AND PRESENTATION          | 2.26                             | 0.99                               | -1.57                        | 1.63            | 1.55                 | -0.92                   | -1.01                               |
| VIRAL MYOCARDITIS                            | 2.23                             | 1.16                               | -1.91                        | -1.41           | -1.45                | 0.91                    | -0.96                               |
| MALARIA                                      | 2.19                             | 1.63                               | -1.77                        | -0.96           | -1.03                | -1.12                   | -0.95                               |
| INFLAMMATORY BOWEL DISEASE (IBD)             | 2.19                             | 1.10                               | -2.34                        | -1.30           | -1.27                | -1.04                   | -1.00                               |
| PHAGOSOME                                    | 2.16                             | 0.97                               | -1.49                        | 1.08            | 1.03                 | -1.26                   | -1.32                               |
| CYTOKINE-CYTOKINE RECEPTOR INTERACTION       | 2.14                             | 1.01                               | -2.35                        | -1.42           | -1.35                | -0.95                   | -0.88                               |
| OSTEOCLAST DIFFERENTIATION                   | 2.05                             | -1.15                              | -1.94                        | 0.93            | 0.92                 | 0.89                    | 0.90                                |
| TYPE I DIABETES MELLITUS                     | 2.03                             | 0.86                               | -2.09                        | 1.34            | 1.28                 | -1.19                   | -1.14                               |
| PERTUSSIS                                    | 2.00                             | -0.92                              | -1.73                        | -1.32           | -1.30                | 0.75                    | 0.86                                |
| RHEUMATOID ARTHRITIS                         | 1.94                             | 0.74                               | -1.65                        | 0.99            | 0.93                 | -1.41                   | -1.39                               |

|                                              |      |       |       |       |       |       |       |
|----------------------------------------------|------|-------|-------|-------|-------|-------|-------|
| CELL ADHESION MOLECULES (CAMS)               | 1.87 | 1.70  | -2.11 | 1.28  | 1.28  | -0.95 | -0.97 |
| NF-KAPPA B SIGNALING PATHWAY                 | 1.87 | 1.24  | -2.30 | -1.22 | -1.22 | 1.31  | 1.20  |
| RIBOSOME                                     | 1.82 | 1.69  | 0.96  | -2.06 | -2.26 | -2.11 | -2.30 |
| HEMATOPOIETIC CELL LINEAGE                   | 1.78 | 0.84  | -2.53 | -1.08 | -1.11 | -1.39 | -1.44 |
| HERPES SIMPLEX INFECTION                     | 1.77 | 1.09  | -2.01 | -1.41 | -1.28 | 1.18  | 1.17  |
| LYSOSOME                                     | 1.73 | -0.90 | 0.95  | 1.41  | 1.34  | -1.48 | -1.60 |
| LEUKOCYTE TRANSENDOTHELIAL MIGRATION         | 1.70 | 1.19  | -1.87 | 0.91  | -1.01 | 1.03  | 1.07  |
| HTLV-I INFECTION                             | 1.69 | 0.98  | -1.59 | -1.26 | -1.29 | 1.25  | 1.26  |
| TRANSCRIPTIONAL MISREGULATION IN CANCER      | 1.68 | 0.84  | -1.55 | -1.24 | -1.12 | 1.17  | 1.12  |
| VITAMIN DIGESTION AND ABSORPTION             | 1.68 | 0.47  | 0.93  | -0.87 | -0.95 | 0.80  | -0.57 |
| NOTCH SIGNALING PATHWAY                      | 1.68 | 1.60  | -0.97 | -0.88 | -0.87 | 1.19  | 1.25  |
| BASAL CELL CARCINOMA                         | 1.65 | 0.83  | 1.14  | 1.19  | 1.22  | 1.65  | 1.81  |
| METABOLISM OF XENOBIOTICS BY CYTOCHROME P450 | 1.64 | 1.50  | -0.96 | 1.15  | 1.08  | -1.79 | -1.67 |
| NATURAL KILLER CELL MEDIATED CYTOTOXICITY    | 1.62 | -1.28 | -2.12 | 0.97  | 0.91  | -1.28 | -1.39 |
| EPSTEIN-BARR VIRUS INFECTION                 | 1.61 | -1.15 | -1.52 | 0.77  | 0.80  | 1.37  | 1.42  |
| CYTOSOLIC DNA-SENSING PATHWAY                | 1.60 | 1.38  | -1.88 | -1.19 | -1.26 | -1.28 | -1.33 |
| TOXOPLASMOSIS                                | 1.59 | 1.27  | -1.57 | 1.02  | 0.95  | 0.83  | 0.94  |
| TUBERCULOSIS                                 | 1.58 | -1.25 | -1.79 | -0.87 | -0.87 | -0.91 | -1.00 |
| APOPTOSIS                                    | 1.58 | 0.82  | -1.72 | -1.35 | -1.34 | 1.01  | 1.07  |
| GLYCOSAMINOGLYCAN DEGRADATION                | 1.57 | -0.95 | -1.20 | 0.77  | 0.81  | -1.12 | -1.05 |
| INFLUENZA A                                  | 1.56 | -1.01 | -1.87 | -1.27 | -1.36 | -0.88 | 0.97  |
| ECM-RECEPTOR INTERACTION                     | 1.55 | 1.51  | -1.14 | 1.02  | 1.01  | -0.75 | -0.73 |
| FC GAMMA R-MEDIATED PHAGOCYTOSIS             | 1.54 | -1.37 | -1.44 | -1.02 | -1.07 | 1.36  | 1.47  |
| PRIMARY IMMUNODEFICIENCY                     | 1.52 | 0.76  | -2.41 | -0.71 | -0.78 | 1.20  | 0.94  |

|                                           |       |       |       |       |       |       |       |
|-------------------------------------------|-------|-------|-------|-------|-------|-------|-------|
| CHEMICAL CARCINOGENESIS                   | 1.50  | 1.36  | -1.06 | 1.02  | 0.96  | -1.77 | -1.65 |
| JAK-STAT SIGNALING PATHWAY                | 1.50  | 0.97  | -2.22 | -1.07 | -1.14 | -0.90 | -0.88 |
| VIRAL CARCINOGENESIS                      | 1.48  | -1.15 | -1.13 | -1.17 | -1.09 | 1.12  | 1.09  |
| BASE EXCISION REPAIR                      | 1.47  | -0.75 | -0.70 | -1.61 | -1.69 | 1.18  | 1.19  |
| TYROSINE METABOLISM                       | 1.47  | 1.21  | 1.04  | 0.63  | 0.57  | 1.44  | 1.60  |
| PPAR SIGNALING PATHWAY                    | 1.47  | 1.41  | 1.21  | 1.43  | 1.35  | -1.07 | -0.99 |
| TNF SIGNALING PATHWAY                     | 1.45  | -1.01 | -1.58 | -1.01 | -1.07 | 1.08  | 1.15  |
| INSULIN RESISTANCE                        | 1.45  | -1.29 | 0.78  | 1.08  | 1.16  | 0.84  | 0.89  |
| ADHERENS JUNCTION                         | 1.44  | 0.73  | -0.91 | -1.13 | -1.06 | 1.57  | 1.67  |
| DRUG METABOLISM - CYTOCHROME P450         | 1.43  | 1.44  | -1.32 | 0.86  | 0.83  | -1.59 | -1.48 |
| PATHOGENIC ESCHERICHIA COLI INFECTION     | 1.42  | -1.14 | -1.22 | -1.32 | -1.40 | 1.27  | 1.14  |
| MINERAL ABSORPTION                        | 1.39  | 1.25  | -0.82 | 1.89  | 1.91  | -1.27 | -1.30 |
| MEASLES                                   | 1.38  | 1.39  | -2.18 | -1.22 | -1.26 | 1.23  | 1.29  |
| B CELL RECEPTOR SIGNALING PATHWAY         | 1.38  | -1.56 | -2.26 | -0.96 | -0.96 | 0.99  | 1.09  |
| NOD-LIKE RECEPTOR SIGNALING PATHWAY       | 1.38  | -1.09 | -1.99 | -1.39 | -1.50 | 0.99  | 1.20  |
| PRION DISEASES                            | 1.37  | -1.39 | 0.87  | 1.05  | 0.95  | 0.94  | 1.01  |
| SALMONELLA INFECTION                      | 1.33  | -1.23 | -1.24 | -1.52 | -1.51 | 1.31  | 1.42  |
| CHAGAS DISEASE (AMERICAN TRYPANOSOMIASIS) | 1.33  | -1.09 | -2.00 | -1.28 | -1.23 | 0.95  | 0.94  |
| LEGIONELLOSIS                             | 1.33  | 1.09  | -1.50 | -1.03 | -0.99 | -1.44 | -1.33 |
| GALACTOSE METABOLISM                      | 1.31  | -1.11 | 0.82  | 1.02  | 0.90  | -1.14 | -1.29 |
| RAP1 SIGNALING PATHWAY                    | 1.31  | -1.54 | -1.12 | 0.98  | 0.95  | 1.18  | 1.33  |
| METABOLIC PATHWAYS                        | -1.18 | 0.90  | 1.07  | 1.12  | 1.07  | -1.25 | -1.31 |
| DORSO-VENTRAL AXIS FORMATION              | -1.19 | -1.29 | 0.72  | 0.98  | 1.00  | 1.34  | 1.43  |
| AMINOACYL-TRNA BIOSYNTHESIS               | -1.19 | -1.29 | 1.13  | -1.41 | -1.47 | 1.56  | 1.67  |
| THYROID HORMONE SIGNALING PATHWAY         | -1.19 | -1.29 | -1.14 | 0.92  | 0.93  | 1.42  | 1.48  |
| RNA TRANSPORT                             | -1.20 | -1.41 | 1.49  | -1.23 | -1.33 | 1.64  | 1.73  |
| REGULATION OF                             | -1.20 | 1.24  | -0.64 | 0.80  | 0.92  | -0.78 | -0.92 |

|                                                 |       |       |       |       |       |       |       |
|-------------------------------------------------|-------|-------|-------|-------|-------|-------|-------|
| AUTOPHAGY                                       |       |       |       |       |       |       |       |
| GLIOMA                                          | -1.21 | -1.81 | -0.94 | -1.10 | -1.03 | -1.00 | -1.11 |
| PURINE METABOLISM                               | -1.23 | -0.75 | -0.85 | -1.01 | -1.06 | 1.12  | 1.12  |
| LONGEVITY REGULATING PATHWAY                    | -1.23 | -1.35 | -0.68 | -0.93 | -0.88 | 1.01  | 1.04  |
| PHOSPHOLIPASE D SIGNALING PATHWAY               | -1.26 | -1.64 | -1.22 | -1.01 | -0.87 | 1.41  | 1.50  |
| SYNAPTIC VESICLE CYCLE                          | -1.26 | -2.27 | 1.92  | 1.91  | 1.96  | -1.38 | -1.39 |
| LONGEVITY REGULATING PATHWAY - MULTIPLE SPECIES | -1.26 | -1.17 | -0.79 | 0.83  | 0.88  | 1.11  | 1.23  |
| CHOLINE METABOLISM IN CANCER                    | -1.26 | -1.78 | -0.98 | 1.02  | 1.03  | 1.23  | 1.30  |
| RENAL CELL CARCINOMA                            | -1.27 | -1.63 | -0.92 | -0.96 | -0.84 | 1.10  | 1.18  |
| D-GLUTAMINE AND D-GLUTAMATE METABOLISM          | -1.28 | -1.08 | 0.87  | -0.43 | -0.45 | 1.11  | 1.16  |
| FATTY ACID DEGRADATION                          | -1.28 | 1.80  | 0.89  | 1.19  | 1.14  | -0.98 | -0.91 |
| ALANINE, ASPARTATE AND GLUTAMATE METABOLISM     | -1.28 | -1.13 | 1.21  | 1.49  | 1.34  | 1.28  | 1.43  |
| RAS SIGNALING PATHWAY                           | -1.30 | -1.64 | -1.00 | -1.06 | -1.02 | -0.91 | -0.96 |
| SPHINGOLIPID SIGNALING PATHWAY                  | -1.31 | -1.26 | -1.62 | -1.01 | -1.01 | 1.20  | 1.22  |
| COLORECTAL CANCER                               | -1.31 | -1.66 | -1.51 | -0.96 | -0.95 | 1.16  | 1.33  |
| WNT SIGNALING PATHWAY                           | -1.31 | -0.98 | -1.04 | 1.05  | 1.11  | 1.51  | 1.59  |
| GASTRIC ACID SECRETION                          | -1.31 | -1.54 | -0.90 | 1.47  | 1.47  | 1.13  | 1.17  |
| BIOSYNTHESIS OF UNSATURATED FATTY ACIDS         | -1.32 | 0.70  | 0.93  | -0.68 | -0.84 | 0.96  | 1.09  |
| NON-HOMOLOGOUS END-JOINING                      | -1.32 | -1.45 | -0.70 | -1.27 | -1.17 | 1.62  | 1.80  |
| AMYOTROPHIC LATERAL SCLEROSIS (ALS)             | -1.33 | -1.51 | -1.23 | 1.05  | 0.98  | 1.03  | 1.06  |
| MELANOGENESIS                                   | -1.33 | -1.35 | -1.05 | 1.31  | 1.28  | 1.52  | 1.66  |
| CAMP SIGNALING PATHWAY                          | -1.34 | -1.75 | -0.96 | 1.16  | 1.26  | 1.22  | 1.33  |
| FATTY ACID                                      | -1.35 | 0.64  | -0.89 | 1.06  | 1.01  | 0.99  | 0.97  |



|                                                  |       |       |       |       |       |       |       |
|--------------------------------------------------|-------|-------|-------|-------|-------|-------|-------|
| BIOSYNTHESIS                                     |       |       |       |       |       |       |       |
| NEUROACTIVE LIGAND-RECEPTOR INTERACTION          | -1.36 | -1.76 | -1.20 | 1.31  | 1.21  | -0.94 | -0.83 |
| BETA-ALANINE METABOLISM                          | -1.36 | 1.36  | 1.08  | 1.31  | 1.28  | -0.82 | -0.94 |
| ALDOSTERONE SYNTHESIS AND SECRETION              | -1.38 | -2.04 | -0.91 | 1.42  | 1.42  | 1.13  | 1.14  |
| VASOPRESSIN-REGULATED WATER REABSORPTION         | -1.38 | -1.16 | -0.91 | 0.99  | 0.98  | 1.01  | 1.08  |
| GAP JUNCTION                                     | -1.38 | -1.84 | -1.04 | 0.88  | 0.84  | 1.49  | 1.41  |
| NON-SMALL CELL LUNG CANCER                       | -1.38 | -1.86 | -0.97 | -1.09 | -1.05 | 1.04  | 1.02  |
| GNRH SIGNALING PATHWAY                           | -1.43 | -1.79 | -0.99 | -0.83 | -0.81 | 1.35  | 1.28  |
| PEROXISOME                                       | -1.43 | 1.45  | 0.86  | 1.15  | 1.11  | -0.91 | -0.93 |
| CIRCADIAN RHYTHM                                 | -1.43 | -0.99 | -1.15 | -1.30 | -1.30 | 0.79  | 0.94  |
| TERPENOID BACKBONE BIOSYNTHESIS                  | -1.44 | -1.16 | 1.40  | 0.83  | 0.66  | 1.11  | 1.40  |
| SEROTONERGIC SYNAPSE                             | -1.45 | -1.47 | -1.21 | 0.83  | 0.80  | -1.19 | -1.18 |
| PROGESTERONE-MEDIATED OOCYTE MATURATION          | -1.47 | -1.99 | -0.95 | -1.25 | -1.25 | 1.40  | 1.52  |
| PROLACTIN SIGNALING PATHWAY                      | -1.49 | -1.44 | -1.05 | -0.95 | -0.94 | 1.39  | 1.50  |
| PANCREATIC SECRETION                             | -1.49 | -1.66 | -1.13 | 1.43  | 1.44  | -0.90 | -1.00 |
| INFLAMMATORY MEDIATOR REGULATION OF TRP CHANNELS | -1.49 | -1.76 | -1.62 | 1.00  | 0.94  | 0.89  | 0.98  |
| AXON GUIDANCE                                    | -1.50 | -1.39 | -0.85 | 1.20  | 1.20  | 1.09  | 1.07  |
| PYRUVATE METABOLISM                              | -1.53 | -1.12 | 0.49  | 0.82  | 0.77  | 0.92  | 1.05  |
| VASCULAR SMOOTH MUSCLE CONTRACTION               | -1.53 | -1.35 | -1.48 | 0.80  | 0.80  | 0.90  | 1.10  |
| INOSITOL PHOSPHATE METABOLISM                    | -1.54 | -0.91 | -1.08 | 1.35  | 1.41  | 0.86  | -0.97 |
| FATTY ACID ELONGATION                            | -1.54 | 1.01  | 1.61  | 1.16  | 1.06  | -1.41 | -1.38 |
| PANTOTHENATE AND COA BIOSYNTHESIS                | -1.56 | -0.56 | -1.22 | -1.06 | -0.99 | 1.23  | 1.18  |

|                                                              |       |       |       |       |       |       |       |
|--------------------------------------------------------------|-------|-------|-------|-------|-------|-------|-------|
| ERBB SIGNALING PATHWAY                                       | -1.56 | -2.13 | -0.94 | -1.04 | -1.03 | -0.90 | -1.05 |
| CALCIUM SIGNALING PATHWAY                                    | -1.56 | -1.90 | -1.41 | 1.33  | 1.24  | 0.99  | 0.98  |
| PHOSPHATIDYLINOSITOL SIGNALING SYSTEM                        | -1.58 | -1.37 | -0.97 | 1.39  | 1.47  | -0.86 | -1.01 |
| CITRATE CYCLE (TCA CYCLE)                                    | -1.60 | -0.53 | 1.03  | 1.08  | 0.99  | -0.89 | -0.83 |
| SALIVARY SECRETION                                           | -1.61 | -1.88 | -1.66 | 1.51  | 1.59  | 0.83  | 0.90  |
| ENDOCRINE AND OTHER FACTOR-REGULATED CALCIUM REABSORPTION    | -1.64 | -1.53 | 0.90  | 1.64  | 1.65  | -0.85 | -0.83 |
| ADRENERGIC SIGNALING IN CARDIOMYOCYTES                       | -1.65 | -1.58 | -1.17 | 1.22  | 1.20  | 1.05  | 1.09  |
| SELENOCOMPOUND METABOLISM                                    | -1.66 | 0.89  | 1.04  | -0.69 | -0.64 | 1.14  | 1.36  |
| RENIN SECRETION                                              | -1.71 | -0.78 | -1.38 | 1.03  | 1.05  | 1.24  | 1.24  |
| OXYTOCIN SIGNALING PATHWAY                                   | -1.71 | -2.00 | -1.43 | -0.96 | -0.97 | 0.94  | 1.03  |
| OOCYTE MEIOSIS                                               | -1.73 | -1.78 | -0.75 | -1.39 | -1.38 | 1.56  | 1.58  |
| CGMP-PKG SIGNALING PATHWAY                                   | -1.77 | -1.70 | -0.86 | 1.14  | 1.18  | 1.36  | 1.44  |
| LONG-TERM DEPRESSION                                         | -1.79 | -1.99 | -1.24 | 0.86  | 0.83  | 1.13  | 1.23  |
| MUCIN TYPE O-GLYCAN BIOSYNTHESIS                             | -1.80 | -1.05 | -1.02 | 0.74  | 0.85  | -0.93 | -0.81 |
| AMPHETAMINE ADDICTION                                        | -1.80 | -1.92 | 0.83  | 1.54  | 1.52  | 1.48  | 1.53  |
| CHOLINERGIC SYNAPSE                                          | -1.81 | -1.75 | -1.18 | 1.44  | 1.39  | 0.89  | 0.97  |
| PROPANOATE METABOLISM                                        | -1.82 | -1.13 | 1.17  | 1.20  | 1.12  | -0.89 | 0.89  |
| FATTY ACID METABOLISM                                        | -1.90 | 1.23  | 1.23  | 1.06  | 1.01  | 1.00  | 1.13  |
| SYNTHESIS AND DEGRADATION OF KETONE BODIES                   | -1.91 | -1.58 | -1.08 | -1.08 | -1.15 | 1.14  | 1.33  |
| GLYCOSAMINOGLYCAN BIOSYNTHESIS - HEPARAN SULFATE AND HEPARIN | -1.93 | -1.03 | 1.37  | 1.17  | 1.07  | 0.83  | -0.97 |
| CIRCADIAN ENTRAINMENT                                        | -1.93 | -1.93 | -1.21 | 1.35  | 1.28  | 1.08  | 1.17  |
| VALINE, LEUCINE AND                                          | -1.95 | 1.43  | 1.21  | 1.32  | 1.26  | -0.91 | 0.96  |

|                                            |       |       |       |       |       |       |       |
|--------------------------------------------|-------|-------|-------|-------|-------|-------|-------|
| ISOLEUCINE<br>DEGRADATION                  |       |       |       |       |       |       |       |
| UBIQUITIN MEDIATED<br>PROTEOLYSIS          | -1.97 | -1.32 | -0.71 | -1.52 | -1.54 | 1.05  | 1.19  |
| LONG-TERM<br>POTENTIATION                  | -1.99 | -2.34 | -1.13 | 0.97  | 1.04  | 1.23  | 1.26  |
| BUTANOATE<br>METABOLISM                    | -2.04 | -1.54 | 0.77  | 1.09  | 0.97  | -0.81 | -0.91 |
| GLUTAMATERGIC<br>SYNAPSE                   | -2.21 | -2.20 | -1.15 | 1.02  | 0.96  | 1.24  | 1.37  |
| DOPAMINERGIC<br>SYNAPSE                    | -2.29 | -1.96 | -1.03 | 1.35  | 1.32  | 1.33  | 1.40  |
| NICOTINE ADDICTION                         | -2.30 | -1.72 | 0.86  | 1.93  | 1.91  | 1.23  | 1.26  |
| MORPHINE ADDICTION                         | -2.41 | -1.99 | -1.11 | -1.01 | -0.97 | -0.84 | -0.90 |
| GABAERGIC SYNAPSE                          | -2.42 | -1.89 | 0.82  | 1.06  | 0.99  | -0.94 | -1.11 |
| RETROGRADE<br>ENDOCANNABINOID<br>SIGNALING | -2.43 | -2.17 | -0.94 | 1.18  | 1.06  | 0.87  | 0.86  |

## References

1. Huang DW, Sherman BT, & Lempicki RA (2009) Systematic and integrative analysis of large gene lists using DAVID bioinformatics resources. *Nature Protocols* 4(1):44-57.
2. Huang DW, Sherman BT, & Lempicki RA (2009) Bioinformatics enrichment tools: paths toward the comprehensive functional analysis of large gene lists. *Nucleic Acids Res* 37(1):1-13.
3. Zhang Y, *et al.* (2008) Model-based analysis of ChIP-Seq (MACS). *Genome Biol* 9(9):R137.
4. Loven J, *et al.* (2013) Selective inhibition of tumor oncogenes by disruption of super-enhancers. *Cell* 153(2):320-334.
5. Whyte WA, *et al.* (2013) Master transcription factors and mediator establish super-enhancers at key cell identity genes. *Cell* 153(2):307-319.
6. Szklarczyk D, *et al.* (2017) The STRING database in 2017: quality-controlled protein-protein association networks, made broadly accessible. *Nucleic Acids Res* 45(D1):D362-D368.
7. Ashburner M, *et al.* (2000) Gene Ontology: tool for the unification of biology. *Nat Genet* 25(1):25-29.
8. Carbon S, *et al.* (2017) Expansion of the Gene Ontology knowledgebase and resources. *Nucleic Acids Res* 45(D1):D331-D338.
9. Weitzner DS, Engler-Chiurazzi EB, Kotilinek LA, Ashe KH, & Reed MN (2015) Morris Water Maze Test: Optimization for Mouse Strain and Testing Environment. *J Vis Exp* (100):e52706.
10. Wong CK, *et al.* (2018) The p300 and CBP Transcriptional Coactivators Are Required for beta-Cell and alpha-Cell Proliferation. *Diabetes* 67(3):412-422.
11. Knutson SK, *et al.* (2008) Liver-specific deletion of histone deacetylase 3 disrupts metabolic transcriptional networks. *EMBO J* 27(7):1017-1028.
12. Razidlo DF, *et al.* (2010) Histone deacetylase 3 depletion in osteo/chondroprogenitor cells decreases bone density and increases marrow fat. *PLoS One* 5(7):e11492.
13. Kraft M, *et al.* (2011) Disruption of the histone acetyltransferase MYST4 leads to a Noonan syndrome-like phenotype and hyperactivated MAPK signaling in humans and mice. *J Clin Invest* 121(9):3479-3491.
14. Trivedi CM, *et al.* (2010) Hopx and Hdac2 interact to modulate Gata4 acetylation and embryonic cardiac myocyte proliferation. *Dev Cell* 19(3):450-459.
15. Kasler HG, *et al.* (2011) Histone deacetylase 7 regulates cell survival and TCR signaling in CD4/CD8 double-positive thymocytes. *J Immunol* 186(8):4782-4793.
16. Jacob C, *et al.* (2011) HDAC1 and HDAC2 control the transcriptional program of myelination and the survival of Schwann cells. *Nat Neurosci* 14(4):429-436.
17. Chen X, *et al.* (2012) Requirement for the histone deacetylase Hdac3 for the inflammatory gene expression program in macrophages. *Proc Natl Acad Sci U S A* 109(42):E2865-2874.
18. Winkler R, *et al.* (2012) Histone deacetylase 6 (HDAC6) is an essential modifier of glucocorticoid-induced hepatic gluconeogenesis. *Diabetes* 61(2):513-523.

19. Ravnskjaer K, *et al.* (2013) Glucagon regulates gluconeogenesis through KAT2B- and WDR5-mediated epigenetic effects. *J Clin Invest* 123(10):4318-4328.
20. Turgeon N, *et al.* (2013) HDAC1 and HDAC2 restrain the intestinal inflammatory response by regulating intestinal epithelial cell differentiation. *PLoS One* 8(9):e73785.
21. Sun Z, *et al.* (2013) Deacetylase-independent function of HDAC3 in transcription and metabolism requires nuclear receptor corepressor. *Mol Cell* 52(6):769-782.
22. Alenghat T, *et al.* (2013) Histone deacetylase 3 coordinates commensal-bacteria-dependent intestinal homeostasis. *Nature* 504(7478):153-157.
23. Jamaladdin S, *et al.* (2014) Histone deacetylase (HDAC) 1 and 2 are essential for accurate cell division and the pluripotency of embryonic stem cells. *Proc Natl Acad Sci U S A* 111(27):9840-9845.
24. Stilling RM, *et al.* (2014) K-Lysine acetyltransferase 2a regulates a hippocampal gene expression network linked to memory formation. *EMBO J* 33(17):1912-1927.
25. Turgeon N, *et al.* (2014) The acetylome regulators Hdac1 and Hdac2 differently modulate intestinal epithelial cell dependent homeostatic responses in experimental colitis. *Am J Physiol Gastrointest Liver Physiol* 306(7):G594-605.
26. Crow M, *et al.* (2015) HDAC4 is required for inflammation-associated thermal hypersensitivity. *FASEB J* 29(8):3370-3378.
27. Azagra A, *et al.* (2016) In vivo conditional deletion of HDAC7 reveals its requirement to establish proper B lymphocyte identity and development. *J Exp Med* 213(12):2591-2601.
28. Laguesse S, *et al.* (2015) A Dynamic Unfolded Protein Response Contributes to the Control of Cortical Neurogenesis. *Dev Cell* 35(5):553-567.
29. Carpio LR, *et al.* (2016) Histone deacetylase 3 supports endochondral bone formation by controlling cytokine signaling and matrix remodeling. *Sci Signal* 9(440):ra79.
30. Newman DM, *et al.* (2016) Acetylation of the Cd8 Locus by KAT6A Determines Memory T Cell Diversity. *Cell Rep* 16(12):3311-3321.
31. Papazyan R, *et al.* (2016) Physiological Suppression of Lipotoxic Liver Damage by Complementary Actions of HDAC3 and SCAP/SREBP. *Cell metabolism* 24(6):863-874.
32. Remsberg JR, *et al.* (2017) Deletion of histone deacetylase 3 in adult beta cells improves glucose tolerance via increased insulin secretion. *Mol Metab* 6(1):30-37.
33. Renthal W, *et al.* (2007) Histone deacetylase 5 epigenetically controls behavioral adaptations to chronic emotional stimuli. *Neuron* 56(3):517-529.
34. Stengel KR, *et al.* (2017) Deacetylase activity of histone deacetylase 3 is required for productive VDJ recombination and B-cell development. *Proc Natl Acad Sci U S A* 114(32):8608-8613.
35. Datta M, *et al.* (2018) Histone Deacetylases 1 and 2 Regulate Microglia Function during Development, Homeostasis, and Neurodegeneration in a Context-Dependent Manner. *Immunity* 48(3):514-529 e516.
